# Supplementary material
Source: Springer Nature journal article supplement (https://www.springermedizin.de/resource/supplementary/12889_2008_1297_MOESM16_ESM.pdf/9502888)

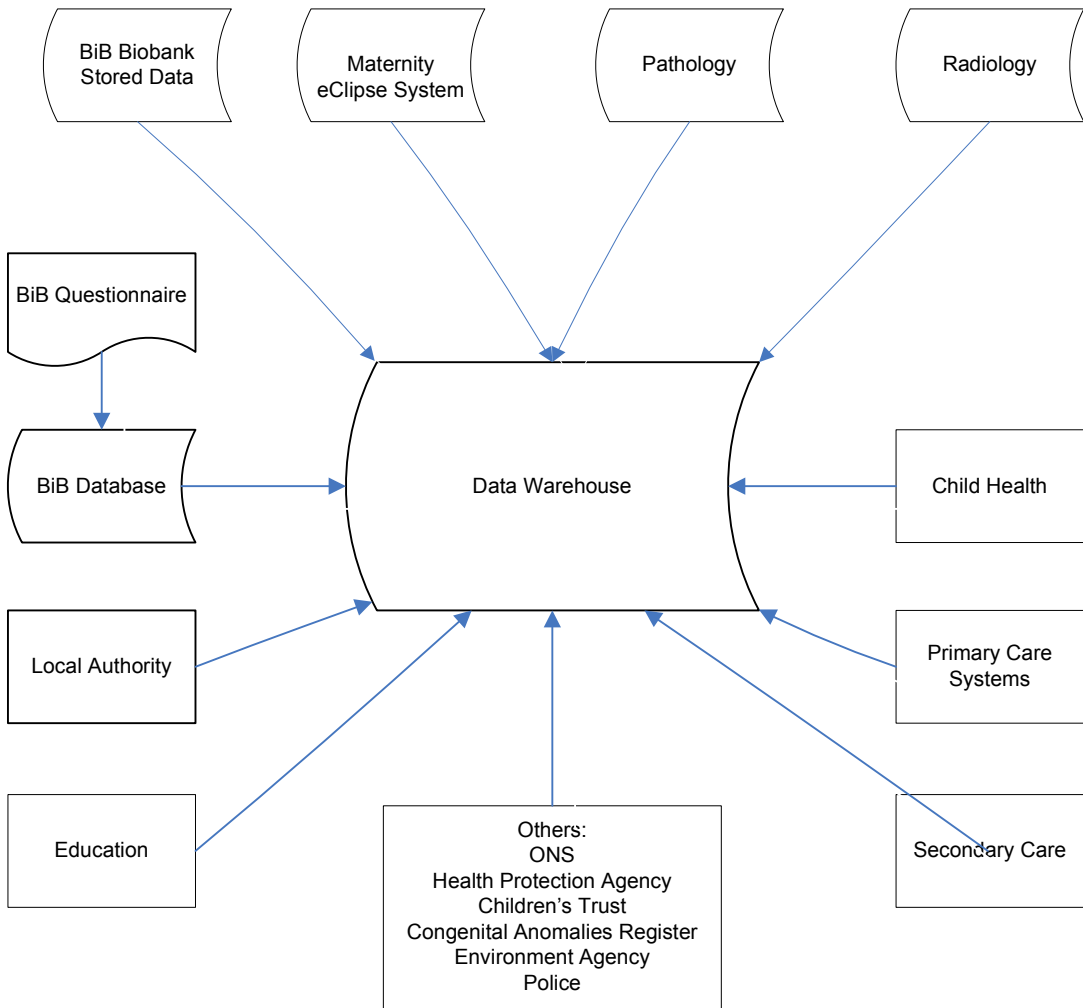

Supplement: MOESM16 [file 9502888]
